# Supplementary material for: Variation in the zero-point energy difference via electrostatic interactions in Co(ii)-Cltpy-based spin-crossover molecular materials
Source: Royal Society of Chemistry journal article supplement (doi:10.1039/d4tc02203c), 2024-10-24
Supplement: d4tc02203c1.pdf [file d4tc02203c1.pdf]

# **Variation in the Zero-Point Energy Difference via Electrostatic Interactions in Co(II)-Cltpy-based Spin-crossover Molecular Materials**

Mousumi Dutta<sup>1</sup>, Ajana Dutta<sup>2#</sup>, Prabir Ghosh<sup>3,5#\*</sup>, Shubhankar Maiti<sup>1#</sup>, Laurentiu Stoleriu<sup>4</sup>,  
Cristian Enachescu<sup>4</sup>, Pradip Chakraborty<sup>1\*</sup>

<sup>1</sup>Department of Chemistry, Indian Institute of Technology Kharagpur, Kharagpur-721302, India

<sup>2</sup>Department of Physics, Indian Institute of Technology Kharagpur, Kharagpur-721302, India

<sup>3</sup>Department of Mechanical Engineering, Indian Institute of Technology Kharagpur, Kharagpur-721302, India

<sup>4</sup>Faculty of Physics, Al. I. Cuza University, 700506 Iasi, Romania

<sup>5</sup>Current address: Centre for Interdisciplinary Science, JIS Institute of Advanced Studies and Research (JISIASR) Kolkata, JIS University, GP Block, Sector-5, Salt Lake, Kolkata-700091, West Bengal, India

# Contributed equally to this work

\*Corresponding Author, E-mail: [pradipc@chem.iitkgp.ac.in](mailto:pradipc@chem.iitkgp.ac.in); [prabir.chem@gmail.com](mailto:prabir.chem@gmail.com)

**FTIR:**

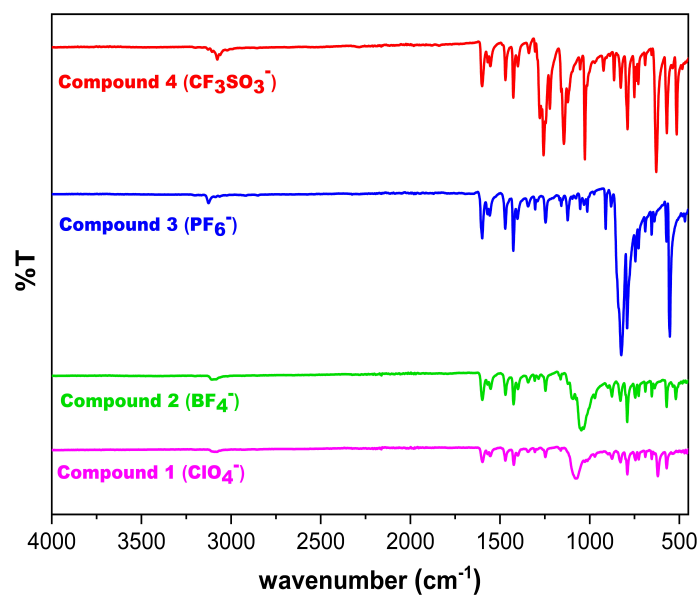

**Figure S1:** FTIR spectra of the as-synthesized compounds 1-4

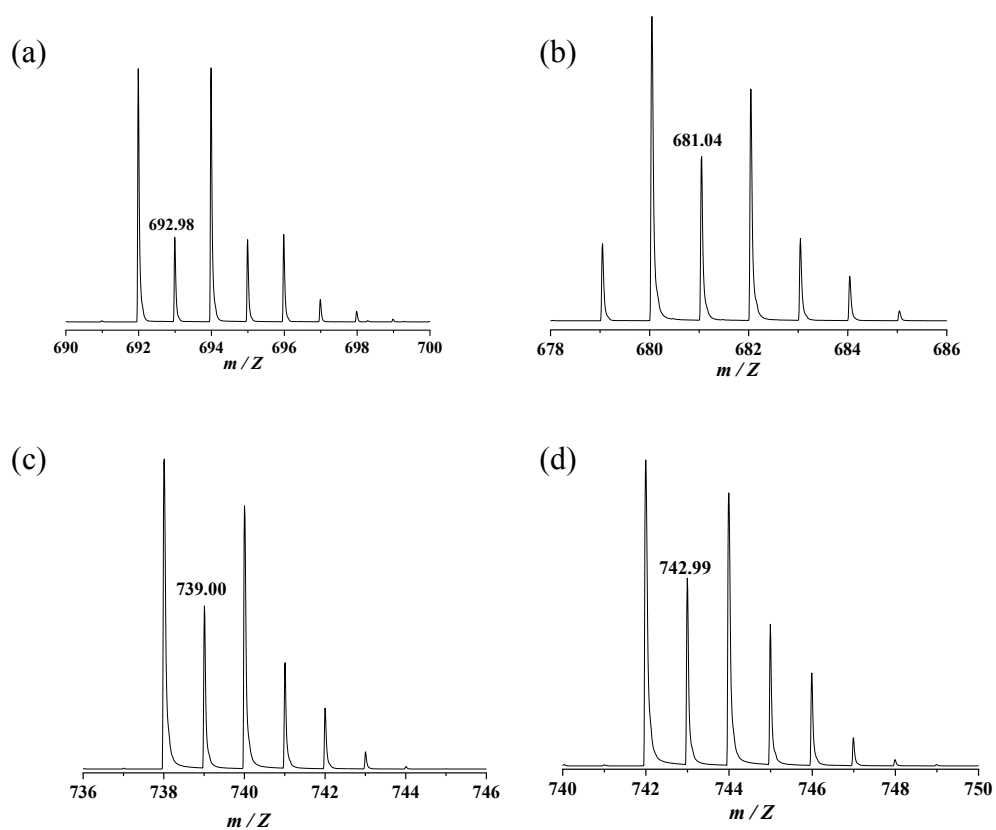

**Figure S2.** Experimental HRMS (+ve mode) spectra of (a)  $\{1\text{-ClO}_4\}^+$ , (b)  $\{2\text{-BF}_4\}^+$ , (c)  $\{3\text{-PF}_6\}^+$  and (d)  $\{4\text{-CF}_3\text{SO}_3\}^+$  in  $\text{CH}_3\text{CN}$ .

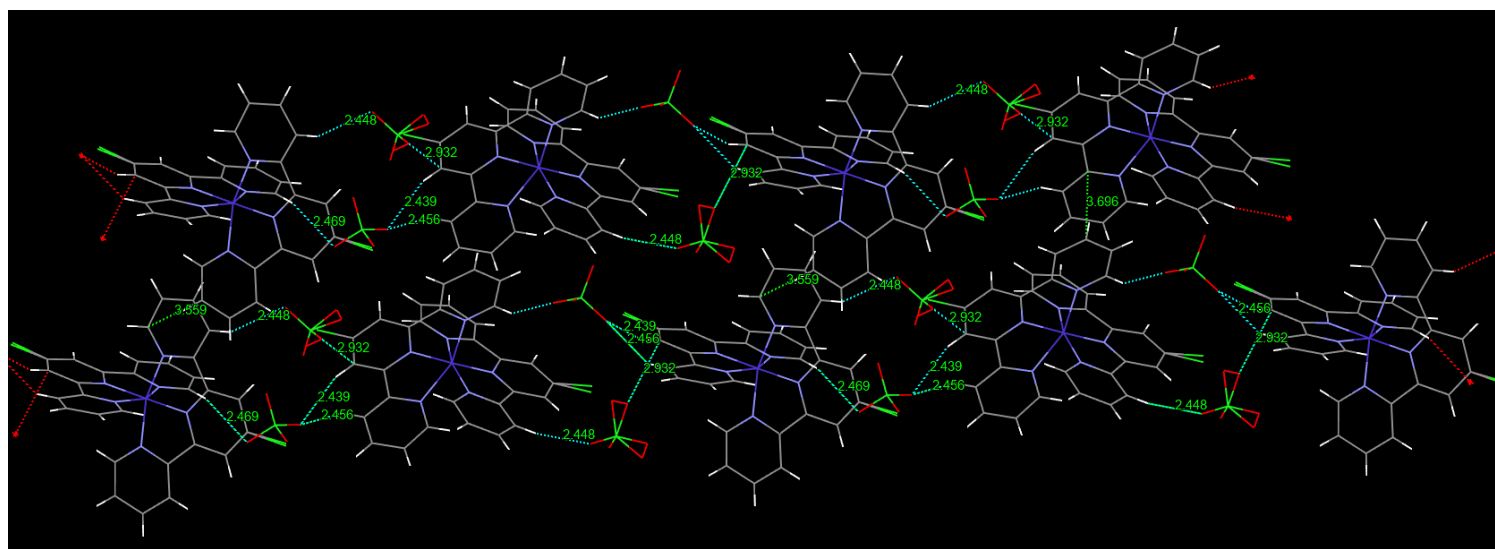

**Figure S3:** 1D chain-like stacked crystal packing pattern for compound 1 (i.e.,  $\text{ClO}_4^-$ ) upon growing the unit cell showing both intra-chain and inter-chain interactions (comparatively strong ) with the relevant interaction lengths providing the strong effective crystal field strength around the Co(II)-spin-crossover centers.

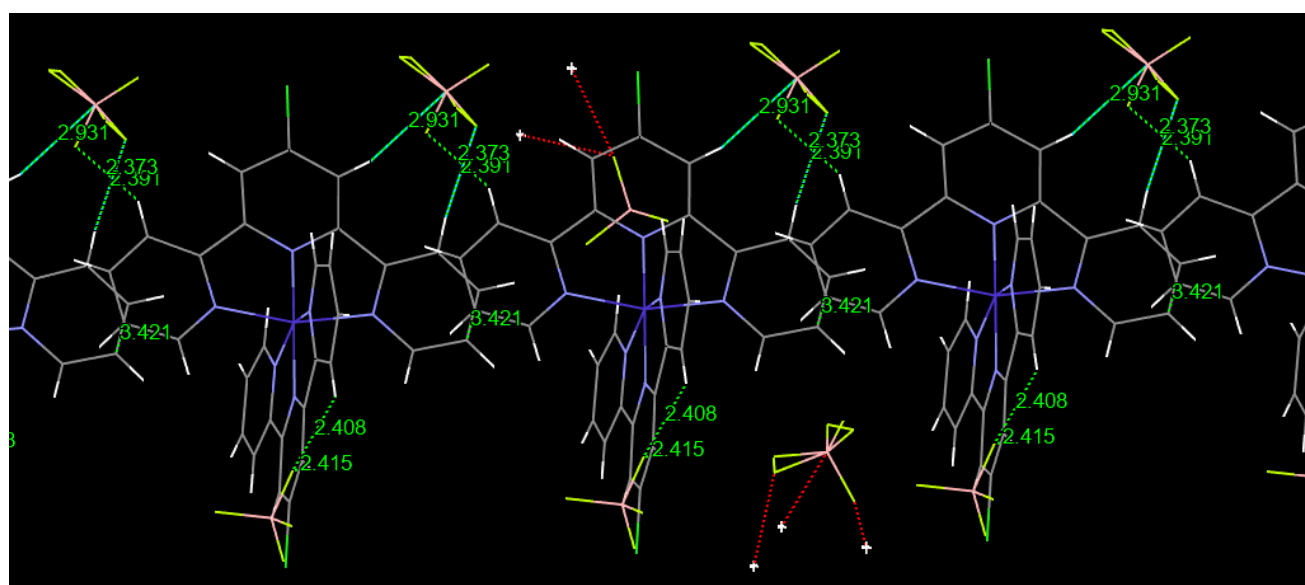

**Figure S4:** 1D chain-like crystal packing pattern for compound 2 (i.e.,  $\text{BF}_4^-$ ) upon growing the unit cell showing only intra-chain interactions (comparatively weak) with the relevant interaction lengths providing the moderately weak effective crystal field strength around the Co(II)-spin-crossover centers.

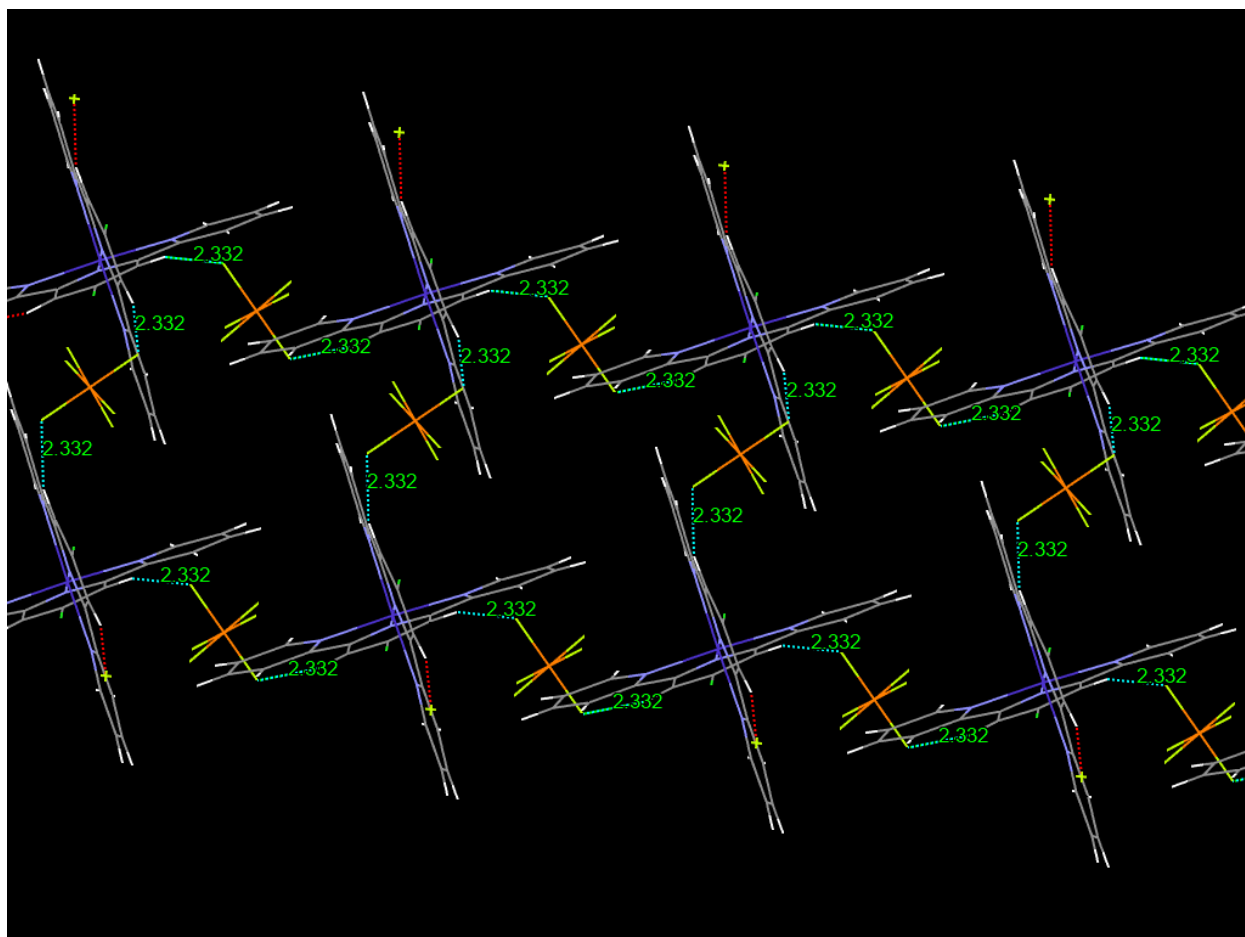

**Figure S5:** 1D chain-like stacked crystal packing pattern for compound 3 (i.e.,  $\text{PF}_6^-$ ) upon growing the unit cell showing both intra-chain and inter-chain interactions (comparatively strong) with the relevant interaction lengths providing the strong effective crystal field strength around the Co(II)-spin-crossover centers.

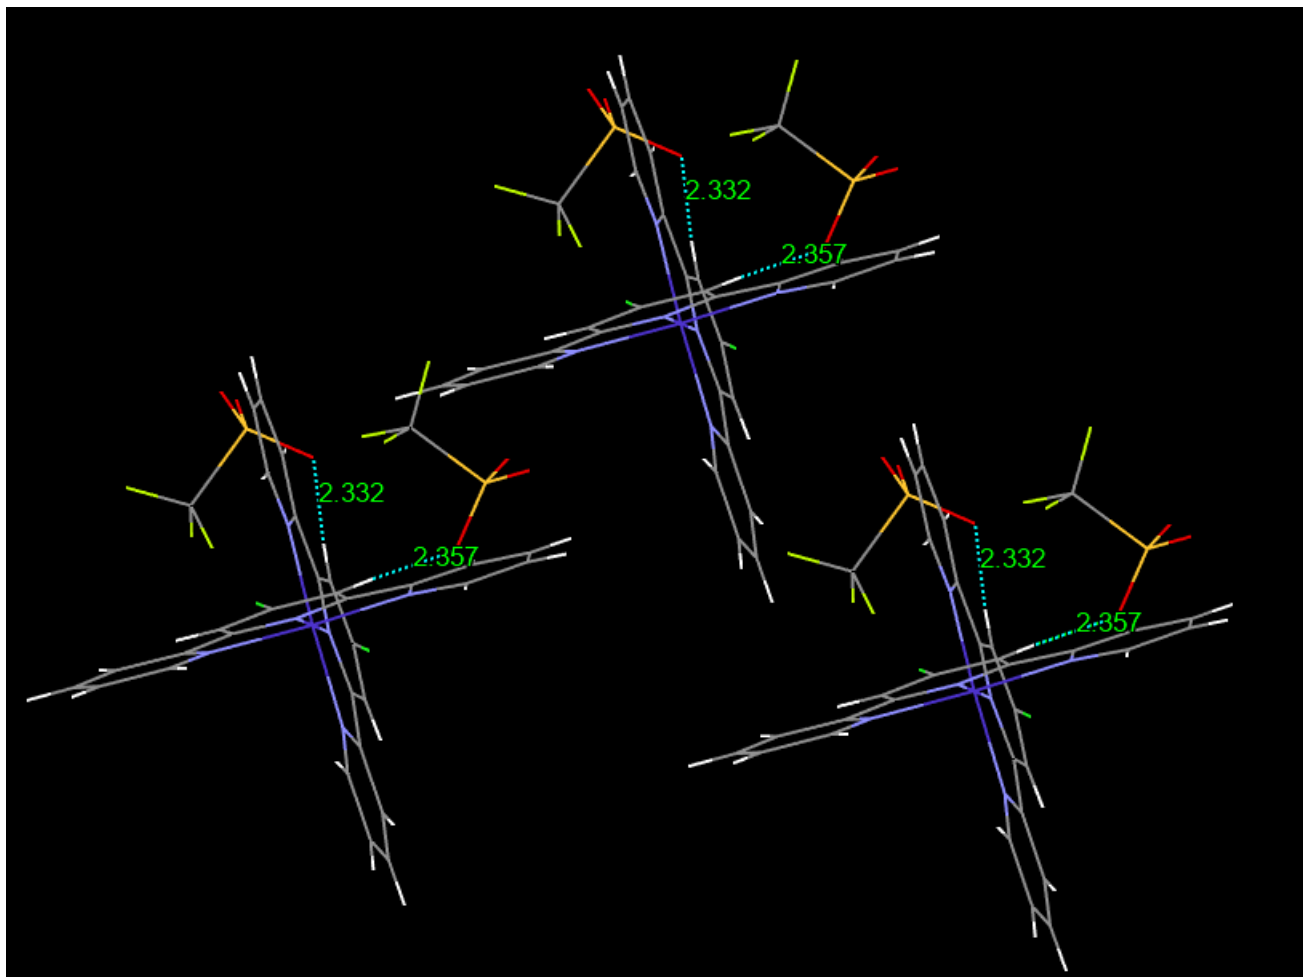

**Figure S6:** Crystal packing pattern for compound 4 (i.e.,  $\text{CF}_3\text{SO}_3^-$ ) shows discrete individual molecular moieties without any intra- and inter-chain molecular interactions providing the weakest effective crystal field strength around the Co(II)-spin-crossover centers.

### Powder X-ray diffraction (PXRD):

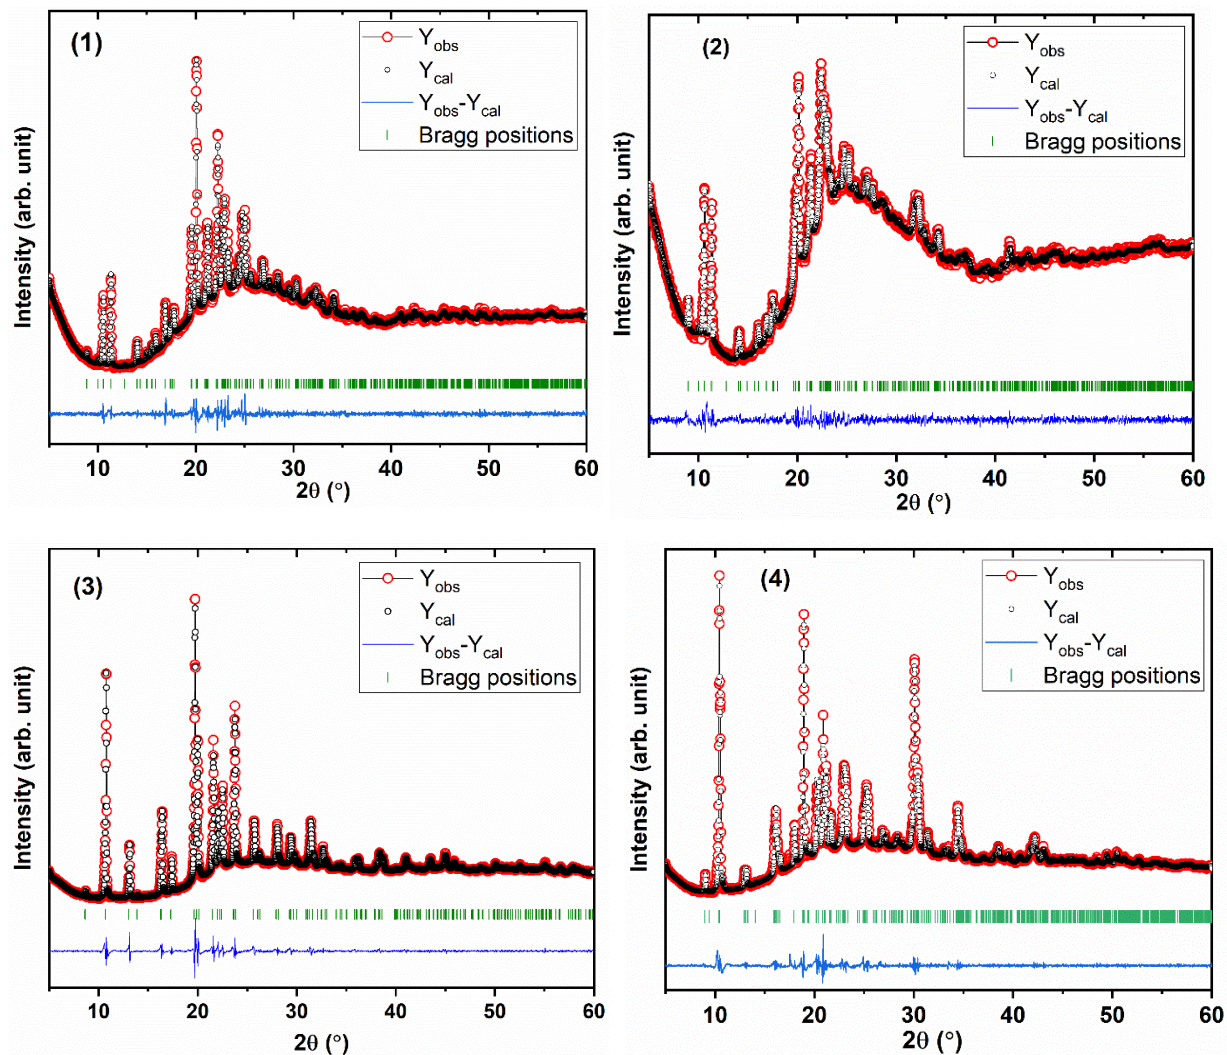

**Figure S7:** PXRD Le Bail profile refinement of  $[\text{Co}(\text{terpy-Cl})_2](\text{ClO}_4)_2$ , (1, top left);  $[\text{Co}(\text{terpy-Cl})_2](\text{BF}_4)_2$ , (2, top right);  $[\text{Co}(\text{terpy-Cl})_2](\text{PF}_6)_2$ , (3, bottom left); and  $[\text{Co}(\text{terpy-Cl})_2](\text{CF}_3\text{SO}_3)_2$ , (4, bottom right) at room temperature.

## EPR spectroscopy:

**Table S1.** EPR data of compound 1-4 at 8 K.

| Compound | $g_z$ | $g_y$ | $g_x$ | $\langle g \rangle^a$ | $\Delta g^b$ |
|----------|-------|-------|-------|-----------------------|--------------|
| 1        | 2.303 | 2.040 | 1.958 | 2.078                 | 0.345        |
| 2        | 2.308 | 2.076 | 1.957 | 2.070                 | 0.351        |
| 3        | 2.247 | 1.997 | 1.953 | 2.119                 | 0.294        |
| 4        | 2.226 | 2.050 | 1.948 | 2.105                 | 0.278        |

$$\langle g \rangle^a = ((1/3)(g_z^2 + g_y^2 + g_x^2))^{1/2}, \Delta g^b = g_z - g_x$$
